# Supplementary material for: Habenula contributions to negative self-cognitions
Source: Nat Commun. 2025 May 7;16:4231. doi: 10.1038/s41467-025-59611-7 (PMC12059057; doi:10.1038/s41467-025-59611-7)
Supplement: Supplementary file 4 — Source Data [file 41467_2025_59611_MOESM4_ESM.xlsx]

## Sheet: Fig. 3b
Figure 3b
Connection	Intrinsic connecitivity	Modulatory connecitivity		Net effective connecitivity
	A-matrix	B-matrix (CHAL)	B-matrix (REP)	A+B (CHAL)	A+B (REP)
Hb-PCC	-0.18	0.939	0.441	0.759	0.261
Hb-pOFC	0	0.333	0	0.333	0
Note. All non-zero parameter estimates has an associated posterior probability >.95, indicating sufficient evidence for a meaningful group effect

## Sheet: Fig. 4b
Figure 4b
Connection	Intrinsic connecitivity	Modulatory connecitivity		Net effective connecitivity
	A-matrix	B-matrix (CHAL)	B-matrix (REP)	A+B (CHAL)	A+B (REP)
Hb-PCC	-0.187	0	0	-0.187	-0.187
Hb-pOFC	0	0.334	0	0.334	0
Note. All non-zero parameter estimates has an associated posterior probability >.95, indicating sufficient evidence for a meaningful group effect
